# Supplementary material for: Quantitative Super-Resolution Imaging for the Analysis of GPCR Oligomerization
Source: MDPI journal article supplement (doi:10.3390/biom11101503), 2021-10-12
Supplement: s1 [file s1]

## Supplementary Material

### Quantitative super-resolution imaging for the analysis of GPCR oligomerization.

Megan D. Joseph, Elena Tomas Bort, Richard P. Grose, Peter J. McCormick and Sabrina Simoncelli

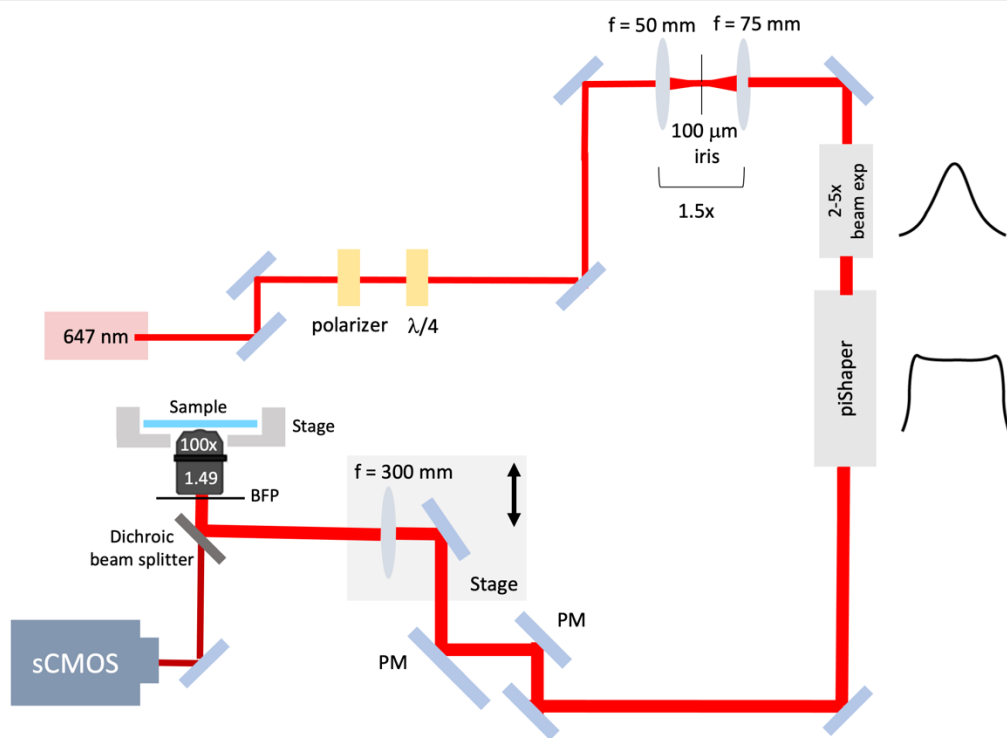

**Figure S1. Schematic of custom-built super-resolution microscopy setup.** Blue rectangles indicate dielectric mirrors, ellipses indicate lenses.

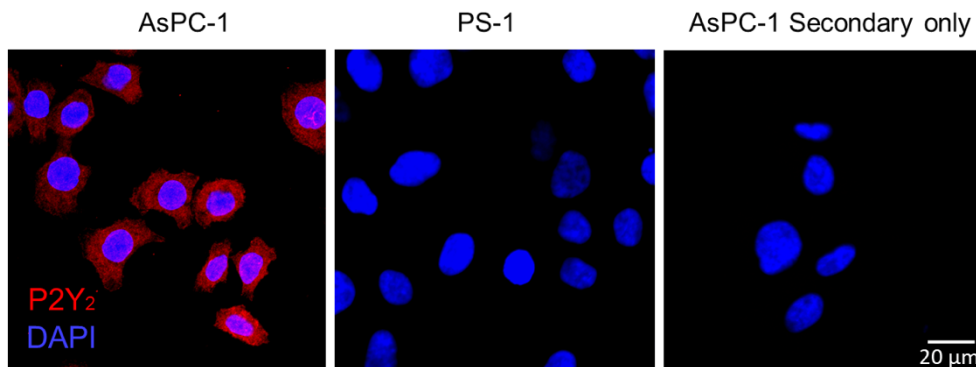

**Figure S2. P2Y<sub>2</sub> and DAPI immunofluorescent staining of AsPC-1 and PS-1 cells for anti-P2Y<sub>2</sub> receptor antibody validation.** AsPC-1 cells show bright red P2Y<sub>2</sub> staining compared to the low P2Y<sub>2</sub> expressing PS-1 cell line and a control using secondary antibody staining only. Images were taken with a confocal microscope. Contrasts setting are the same for all images.

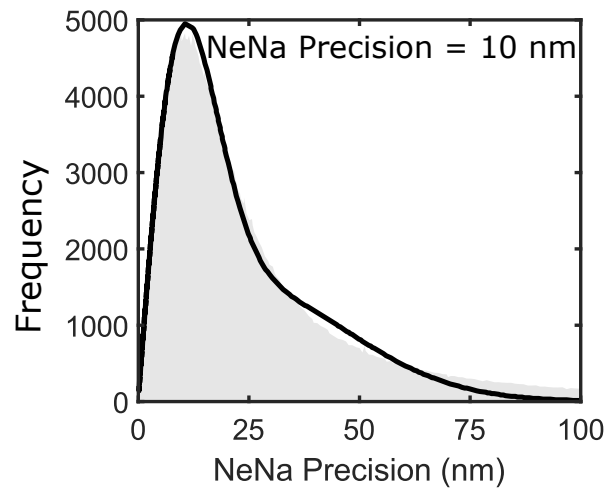

**Figure S3. Overall localization precision of all super-resolution DNA-PAINT images.** Nearest-Neighbour (NeNa) based analysis was used to determine this precision number.

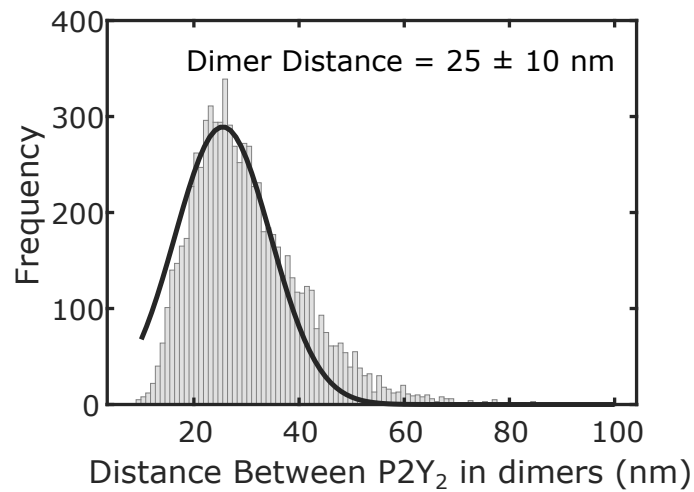

**Figure S4. Distance between P2Y<sub>2</sub> receptors in dimers.** Calculated from P2Y<sub>2</sub> receptors in dimers - pooled from all ROIs in every condition (control, agonist and antagonist treated AsPC-1 cells) as determined by the qPAINT analysis pipeline via *k*-means clustering analysis.
